# Supplementary material for: Research on the quality, mineralogical and structural conditions of silico-ferrite of calcium and aluminum (SFCA) phases in iron ore sinter
Source: Research Square preprint supplement (doi:10.21203/rs.3.rs-1668551/v1), 2022-05-26
Supplement: Supplementary file 1 [file 4bd85dea8dcd918e8c45de89.docx]

**17.05.2022**

**Research Highlight**

1. Pellet dust plays an important role in the formation of SFCA phase structures on its sintering properties.
2. The effects of pellet dust on the physical and mineralogical structure of the sintered material were investigated.
3. The effects of SFCA and sinter quality of the pellet material on its mechanical properties were investigated.
